# Supplementary material for: The reducibility and oxidation states of oxide-supported rhenium: experimental and theoretical investigations
Source: Royal Society of Chemistry journal article supplement (doi:10.1039/d2cp04784e), 2022-01-01
Supplement: d2cp04784e1.pdf [file d2cp04784e1.pdf]

## The reducibility and oxidation states of oxide-supported rhenium: Experimental and theoretical investigations

Kah Wei Ting,<sup>a</sup> Shinya Mine,<sup>a</sup> Abdellah Ait El Fakir,<sup>a</sup> Pengfei Du,<sup>a</sup> Lingcong Li,<sup>a</sup> S. M. A. Hakim Siddiki,<sup>b</sup>  
Takashi Toyao,<sup>\*a</sup> Ken-ichi Shimizu<sup>\*a</sup>

<sup>a</sup> Institute for Catalysis, Hokkaido University, N-21, W-10, Sapporo, Hokkaido 001-0021, Japan

<sup>b</sup> Department of Chemistry, Tokyo Metropolitan University, 1-1 Minami Osawa, Hachioji, Tokyo 192-0397, Japan

\*Corresponding authors

Takashi Toyao, Ken-ichi Shimizu

E-mail: toyao@cat.hokudai.ac.jp, kshimizu@cat.hokudai.ac.jp

## Supplementary data

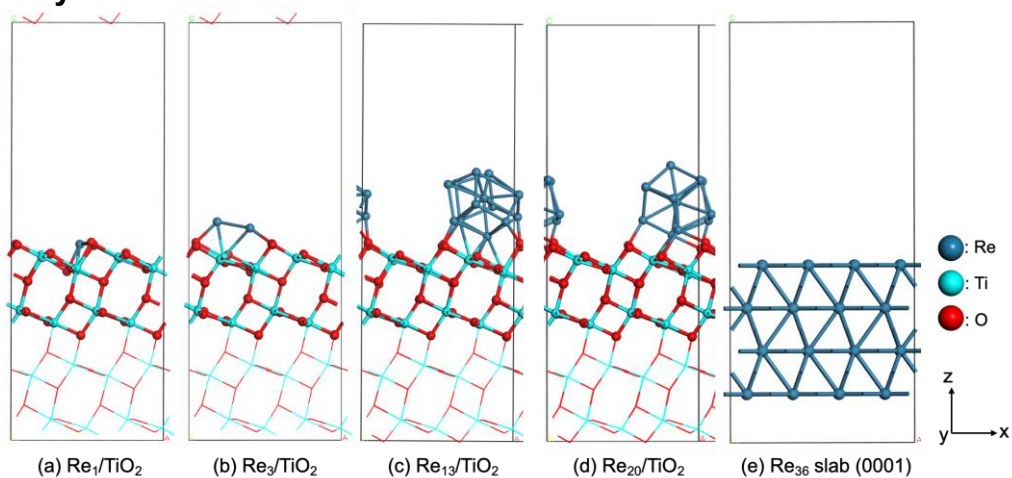

Figure S1. The side view of (a)  $\text{Re}_1/\text{TiO}_2(101)$ , (b)  $\text{Re}_3/\text{TiO}_2(101)$ , (c)  $\text{Re}_{13}/\text{TiO}_2(101)$ , and (d)  $\text{Re}_{20}/\text{TiO}_2(101)$ , and (e)  $\text{Re}(0001)$  slab models used for DFT calculations. The atoms described by ball and stick represent the relaxed layer, and the atoms described by line represent the fixed layer.

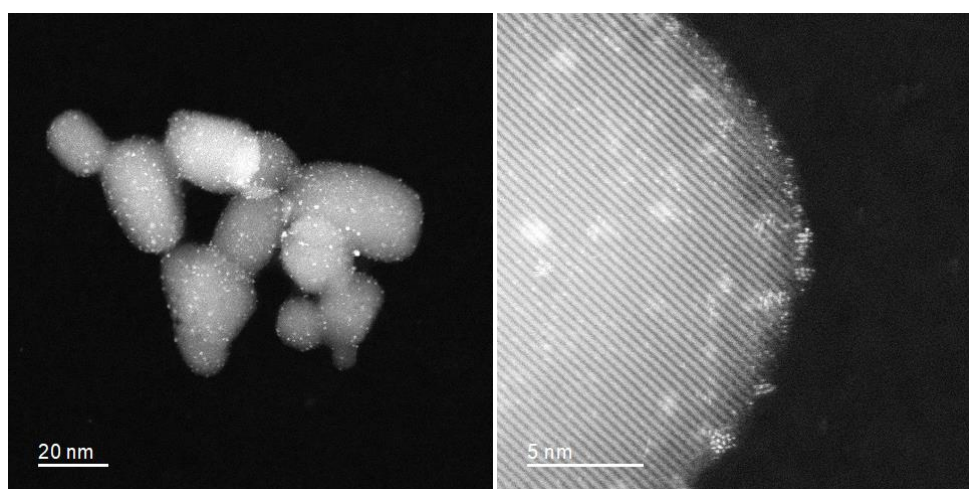

Figure S2. STEM images of  $\text{Re}/\text{TiO}_2$  after the reduction at  $500\text{ }^\circ\text{C}$  under a flow of  $\text{H}_2$ .

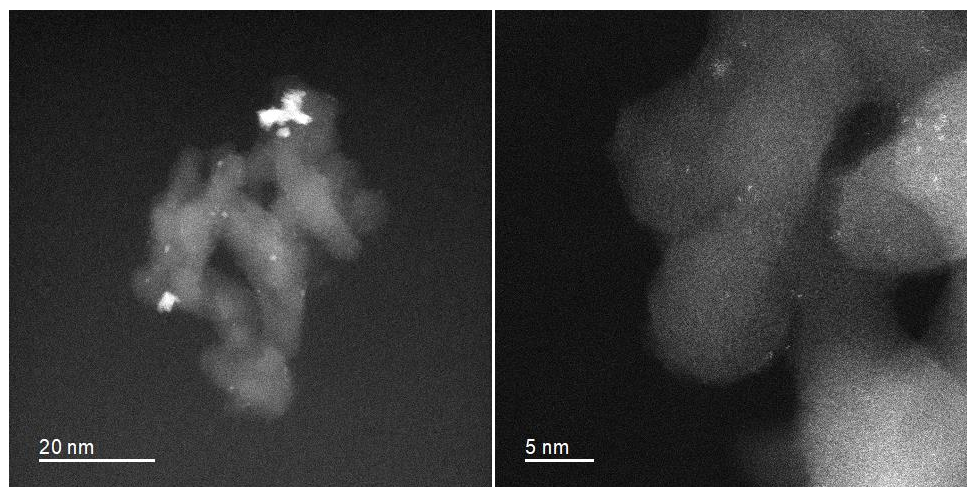

Figure S3. STEM images of  $\text{Re}/\text{SiO}_2$  after the reduction at  $500\text{ }^\circ\text{C}$  under a flow of  $\text{H}_2$ .

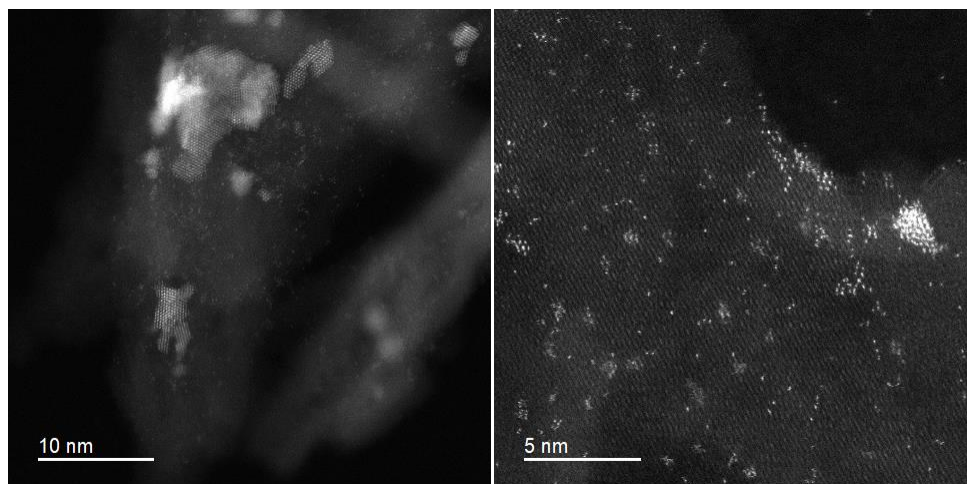

Figure S4. STEM images of Re/Al<sub>2</sub>O<sub>3</sub> after the reduction at 500 °C under a flow of H<sub>2</sub>.

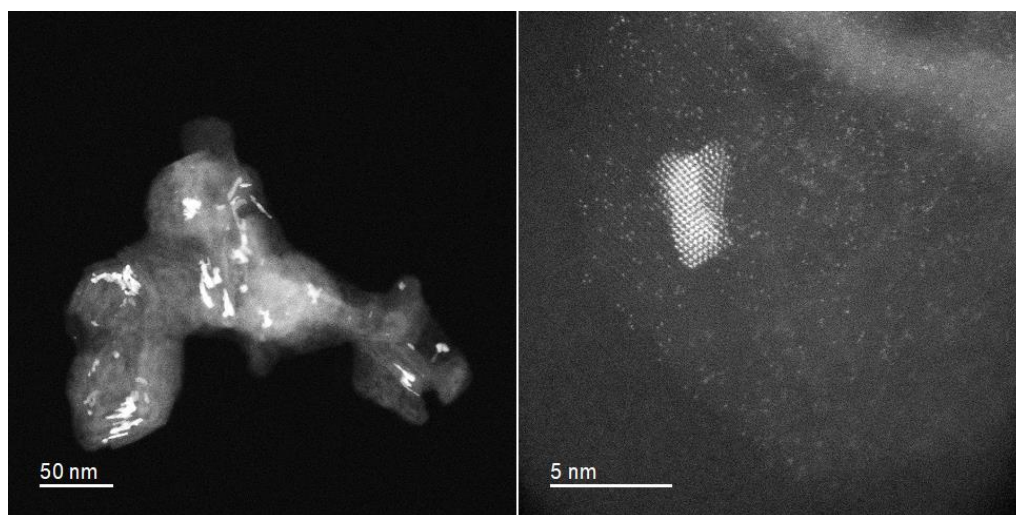

Figure S5. STEM images of Re/MgO after the reduction at 500 °C under a flow of H<sub>2</sub>.

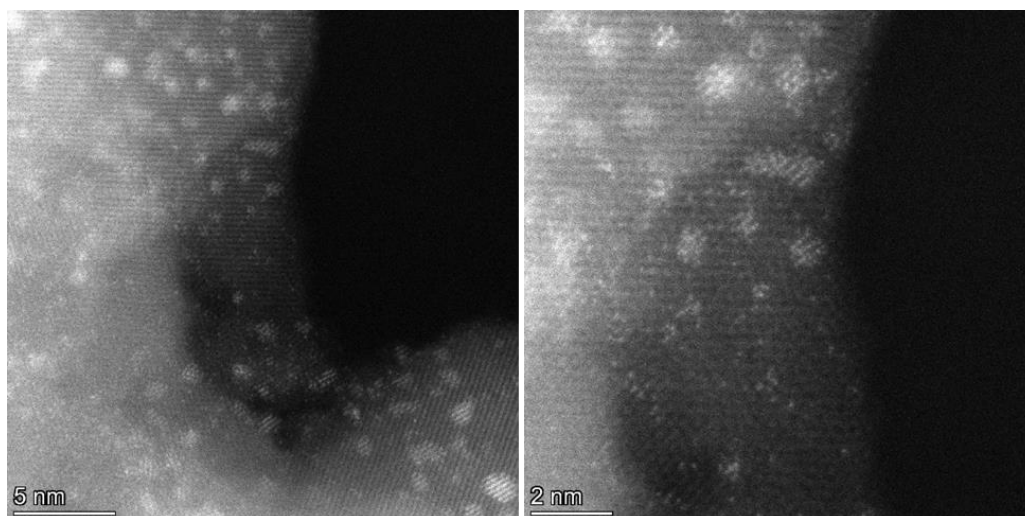

Figure S6. STEM images of Re/V<sub>2</sub>O<sub>5</sub> after the reduction at 500 °C under a flow of H<sub>2</sub>.

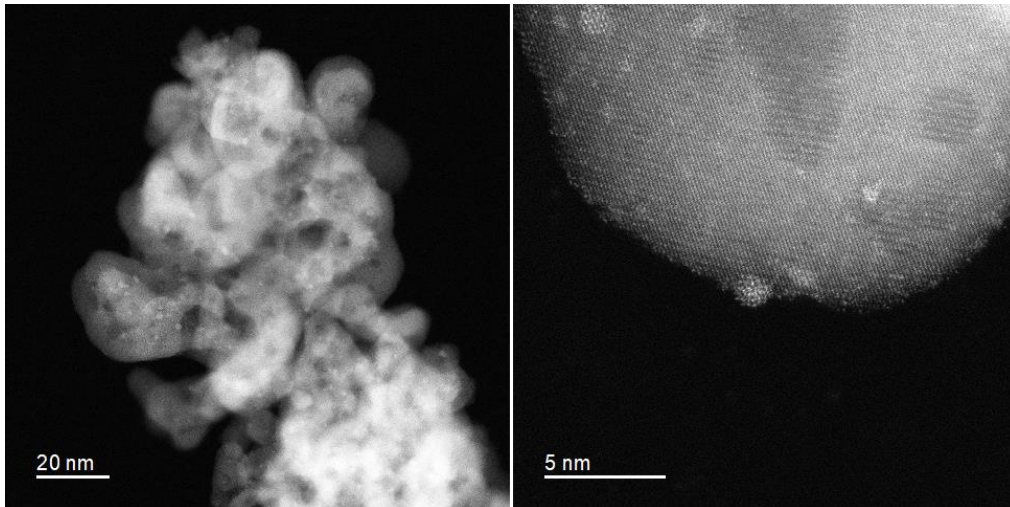

Figure S7. STEM images of Re/ZrO<sub>2</sub> after the reduction at 500 °C under a flow of H<sub>2</sub>.

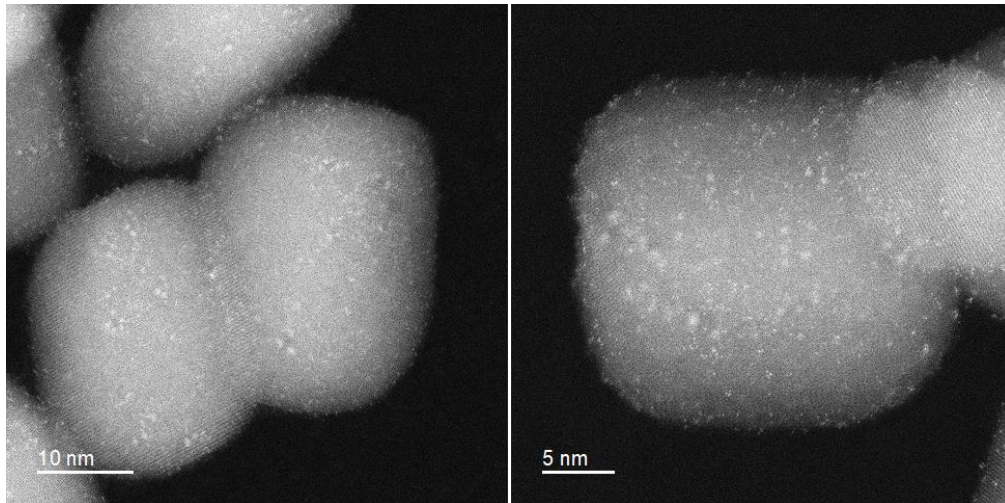

Figure S8. STEM images of Re/TiO<sub>2</sub> without H<sub>2</sub> reduction.

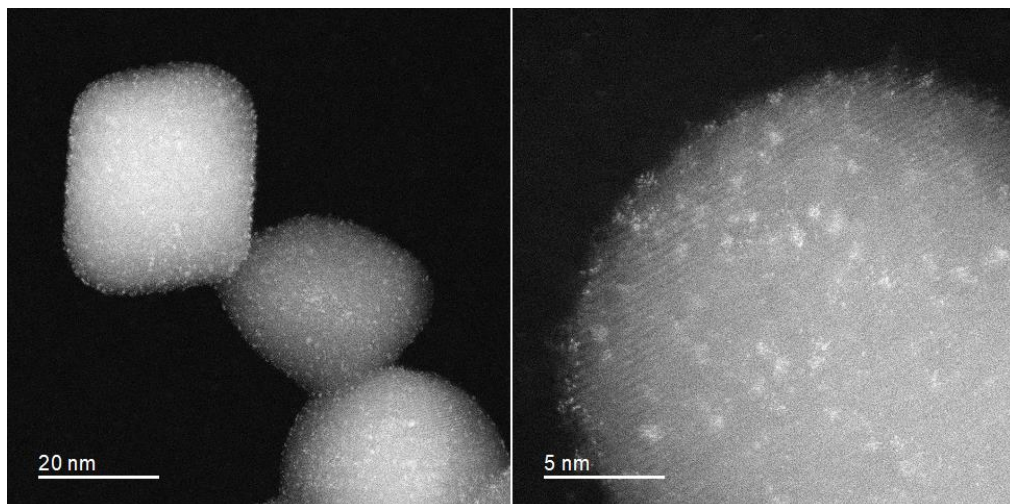

Figure S9. STEM images of Re/TiO<sub>2</sub> after the reduction at 300 °C under a flow of H<sub>2</sub>.

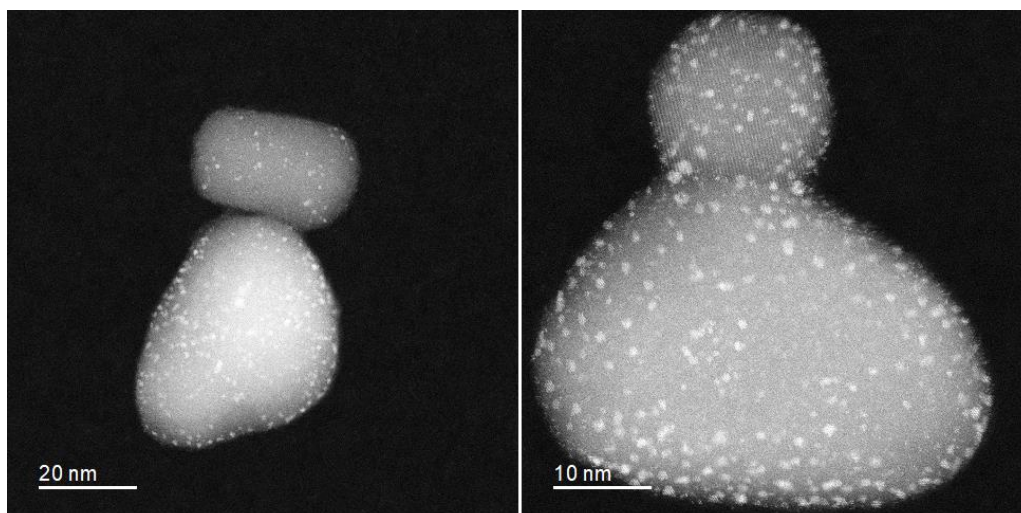

Figure S10. STEM images of Re/TiO<sub>2</sub> after the reduction at 700 °C under a flow of H<sub>2</sub>.

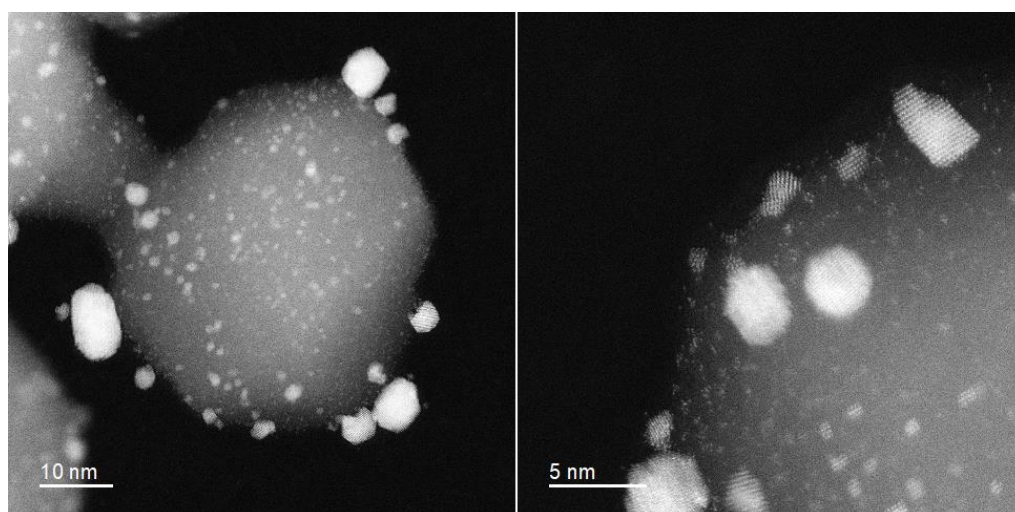

Figure S11. STEM images of Re/TiO<sub>2</sub> after the reduction at 900 °C under a flow of H<sub>2</sub>.

Table S1: Data for LCF of *in situ* Re L<sub>1</sub>-edge XANES spectra of Re(5)/TiO<sub>2</sub>. LCF was performed over a fitting range of -20 to 30 eV relative to the absorption edge (E<sub>0</sub>) using Re powder (Re<sup>0</sup>), ReO<sub>2</sub> (Re<sup>4+</sup>), ReO<sub>3</sub> (Re<sup>6+</sup>), and NH<sub>4</sub>ReO<sub>4</sub> (Re<sup>7+</sup>) as standards.

| Reduction temp. (°C) | R-factor | Re <sup>7+</sup> (%) | Re <sup>6+</sup> (%) | Re <sup>4+</sup> (%) | Re <sup>0</sup> (%) |
|----------------------|----------|----------------------|----------------------|----------------------|---------------------|
| 100                  | 0.00299  | 84 ± 9               | 8 ± 4.7              | < 1                  | 8 ± 2.2             |
| 200                  | 0.00232  | 80 ± 8.1             | 6 ± 4.2              | 6 ± 6.6              | 7 ± 1.9             |
| 300                  | 0.00179  | 1 ± 8.2              | < 1                  | 47 ± 6.8             | 51 ± 2.0            |
| 400                  | 0.00204  | 6 ± 8.6              | < 1                  | 23 ± 7.1             | 72 ± 2.1            |
| 500                  | 0.00186  | 8 ± 8.2              | < 1                  | 14 ± 6.8             | 78 ± 2.0            |
| 600                  | 0.00160  | 7 ± 7.6              | < 1                  | 16 ± 6.3             | 78 ± 1.8            |
| 700                  | 0.00095  | 12 ± 5.7             | < 1                  | 5 ± 4.6              | 83 ± 1.4            |

Table S2: Data for LCF of *in situ* Re L<sub>1</sub>-edge XANES spectra of Re(5)/ZrO<sub>2</sub>. LCF was performed over a fitting range of -20 to 30 eV relative to the absorption edge (E<sub>0</sub>) using Re powder (Re<sup>0</sup>), ReO<sub>2</sub> (Re<sup>4+</sup>), ReO<sub>3</sub> (Re<sup>6+</sup>), and NH<sub>4</sub>ReO<sub>4</sub> (Re<sup>7+</sup>) as standards.

| Reduction temp. (°C) | R-factor | Re <sup>7+</sup> (%) | Re <sup>6+</sup> (%) | Re <sup>4+</sup> (%) | Re <sup>0</sup> (%) |
|----------------------|----------|----------------------|----------------------|----------------------|---------------------|
| 100                  | 0.00360  | 59 ± 11              | 10 ± 5.6             | 31 ± 8.6             | < 1                 |
| 200                  | 0.00249  | 60 ± 8.9             | 17 ± 4.7             | 23 ± 7.3             | < 1                 |
| 300                  | 0.00116  | 4 ± 6.9              | < 1                  | 71 ± 5.6             | 25 ± 1.6            |
| 400                  | 0.00143  | 3 ± 7.8              | < 1                  | 45 ± 6.3             | 52 ± 1.8            |
| 500                  | 0.00230  | 3 ± 9.8              | < 1                  | 36 ± 8.0             | 61 ± 2.2            |
| 600                  | 0.00373  | < 1                  | < 1                  | 27 ± 10              | 73 ± 2.9            |
| 700                  | 0.00331  | 2.5 ± 12             | < 1                  | 23 ± 9.6             | 74 ± 2.7            |

Table S3: Data for LCF of *in situ* Re L<sub>1</sub>-edge XANES spectra of Re(5)/SiO<sub>2</sub>. LCF was performed over a fitting range of -20 to 30 eV relative to the absorption edge (E<sub>0</sub>) using Re powder (Re<sup>0</sup>), ReO<sub>2</sub> (Re<sup>4+</sup>), ReO<sub>3</sub> (Re<sup>6+</sup>), and NH<sub>4</sub>ReO<sub>4</sub> (Re<sup>7+</sup>) as standards.

| Reduction temp. (°C) | R-factor | Re <sup>7+</sup> (%) | Re <sup>6+</sup> (%) | Re <sup>4+</sup> (%) | Re <sup>0</sup> (%) |
|----------------------|----------|----------------------|----------------------|----------------------|---------------------|
| 100                  | 0.00184  | 87 ± 1.3             | 1 ± 2.7              | < 1                  | 6 ± 1.5             |
| 200                  | 0.00153  | 86 ± 1.1             | 2 ± 2.4              | < 1                  | 7 ± 1.4             |
| 300                  | 0.00078  | 17 ± 0.8             | < 1                  | 16 ± 3.0             | 6 ± 1.0             |
| 400                  | 0.00151  | 2 ± 1.1              | < 1                  | 12 ± 4.1             | 8 ± 1.4             |
| 500                  | 0.00119  | < 1                  | < 1                  | 10 ± 3.6             | 8 ± 1.2             |
| 600                  | 0.00155  | < 1                  | < 1                  | 9 ± 4.2              | 8.4 ± 1.4           |
| 700                  | 0.00188  | < 1                  | < 1                  | 9.2 ± 4.6            | 8.4 ± 1.5           |

Table S4: Data for LCF of *in situ* Re L<sub>1</sub>-edge XANES spectra of Re(5)/V<sub>2</sub>O<sub>5</sub>. LCF was performed over a fitting range of -20 to 30 eV relative to the absorption edge (E<sub>0</sub>) using Re powder (Re<sup>0</sup>), ReO<sub>2</sub> (Re<sup>4+</sup>), ReO<sub>3</sub> (Re<sup>6+</sup>), and NH<sub>4</sub>ReO<sub>4</sub> (Re<sup>7+</sup>) as standards.

| Reduction temp. (°C) | R-factor | Re <sup>7+</sup> (%) | Re <sup>6+</sup> (%) | Re <sup>4+</sup> (%) | Re <sup>0</sup> (%) |
|----------------------|----------|----------------------|----------------------|----------------------|---------------------|
| 100                  | 0.00032  | 97 ± 0.6             | < 1                  | 2 ± 2.4              | < 1                 |
| 200                  | 0.00046  | 94 ± 0.7             | < 1                  | 4 ± 2.9              | < 1                 |
| 300                  | 0.00075  | 69 ± 0.9             | 2.7 ± 2.3            | 12 ± 3.8             | 16 ± 1.1            |
| 400                  | 0.00304  | < 1                  | < 1                  | < 1                  | 1                   |
| 500                  | 0.00570  | < 1                  | < 1                  | < 1                  | 1                   |
| 600                  | 0.00190  | < 1                  | < 1                  | < 1                  | 1                   |

Table S5: Data for LCF of *in situ* Re L<sub>1</sub>-edge XANES spectra of Re(5)/Al<sub>2</sub>O<sub>3</sub>. LCF was performed over a fitting range of -20 to 30 eV relative to the absorption edge (E<sub>0</sub>) using Re powder (Re<sup>0</sup>), ReO<sub>2</sub> (Re<sup>4+</sup>), ReO<sub>3</sub> (Re<sup>6+</sup>), and NH<sub>4</sub>ReO<sub>4</sub> (Re<sup>7+</sup>) as standards.

| Reduction temp. (°C) | R-factor | Re <sup>7+</sup> (%) | Re <sup>6+</sup> (%) | Re <sup>4+</sup> (%) | Re <sup>0</sup> (%) |
|----------------------|----------|----------------------|----------------------|----------------------|---------------------|
| 100                  | 0.00183  | 95 ± 1.3             | 57 ± 2.3             | < 1                  | 3 ± 1.4             |
| 200                  | 0.00177  | 90 ± 1.3             | 78 ± 2.2             | < 1                  | 5 ± 1.4             |
| 300                  | 0.00156  | 76 ± 1.2             | 9 ± 2.1              | 12 ± 3.5             | 5 ± 1.3             |
| 400                  | 0.00095  | 3 ± 0.9              | < 1                  | 26 ± 2.7             | 71 ± 0.9            |
| 500                  | 0.00220  | 2 ± 1.4              | < 1                  | 25 ± 3.9             | 72 ± 1.5            |
| 600                  | 0.00519  | 2 ± 2.1              | < 1                  | 25 ± 5.9             | 72 ± 2.2            |
| 700                  | 0.00816  | 2 ± 2.5              | < 1                  | 25 ± 7.3             | 73 ± 2.7            |

Table S6: Data for LCF of *in situ* Re L<sub>1</sub>-edge XANES spectra of Re(5)/MgO. LCF was performed over a fitting range of -20 to 30 eV relative to the absorption edge (E<sub>0</sub>) using Re powder (Re<sup>0</sup>), ReO<sub>2</sub> (Re<sup>4+</sup>), ReO<sub>3</sub> (Re<sup>6+</sup>), and NH<sub>4</sub>ReO<sub>4</sub> (Re<sup>7+</sup>) as standards.

| Reduction temp. (°C) | R-factor | Re <sup>7+</sup> (%) | Re <sup>6+</sup> (%) | Re <sup>4+</sup> (%) | Re <sup>0</sup> (%) |
|----------------------|----------|----------------------|----------------------|----------------------|---------------------|
| 100                  | 0.00183  | 95 ± 1.3             | 57 ± 2.3             | < 1                  | 3 ± 1.4             |
| 200                  | 0.00177  | 90 ± 1.3             | 78 ± 2.2             | < 1                  | 5 ± 1.4             |
| 300                  | 0.00156  | 76 ± 1.2             | 9 ± 2.1              | 12 ± 3.5             | 5 ± 1.3             |
| 400                  | 0.00095  | 3 ± 0.9              | < 1                  | 26 ± 2.7             | 71 ± 0.9            |
| 500                  | 0.00220  | 2 ± 1.4              | < 1                  | 25 ± 3.9             | 72 ± 1.5            |
| 600                  | 0.00519  | 2 ± 2.1              | < 1                  | 25 ± 5.9             | 72 ± 2.2            |
| 700                  | 0.00816  | 2 ± 2.5              | < 1                  | 25 ± 7.3             | 73 ± 2.7            |

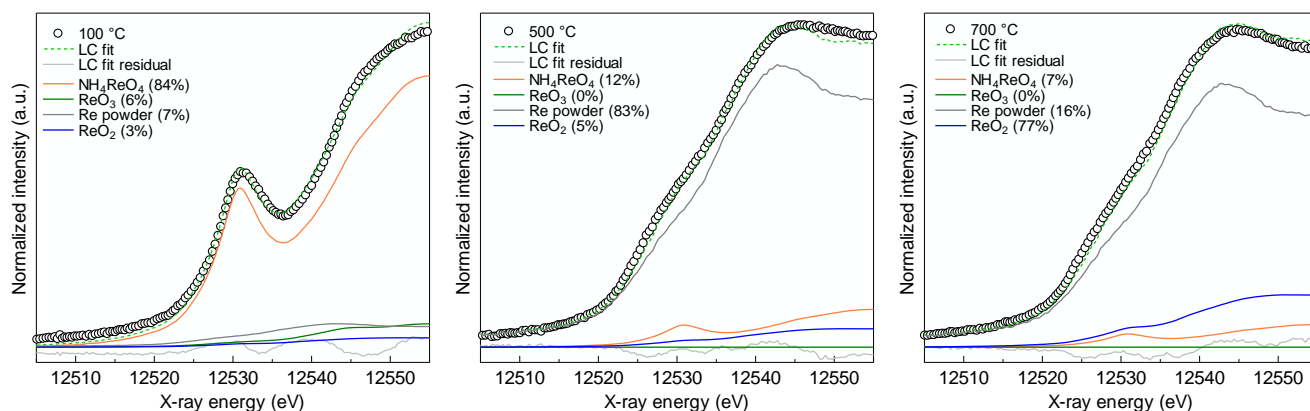

Figure S12: Comparison of experimental and LCF XANES spectra for Re(5)/TiO<sub>2</sub> treated at 100 °C, 500 °C and 700 °C reduction temperature. Component fraction of each standard is also included for ease of reference.

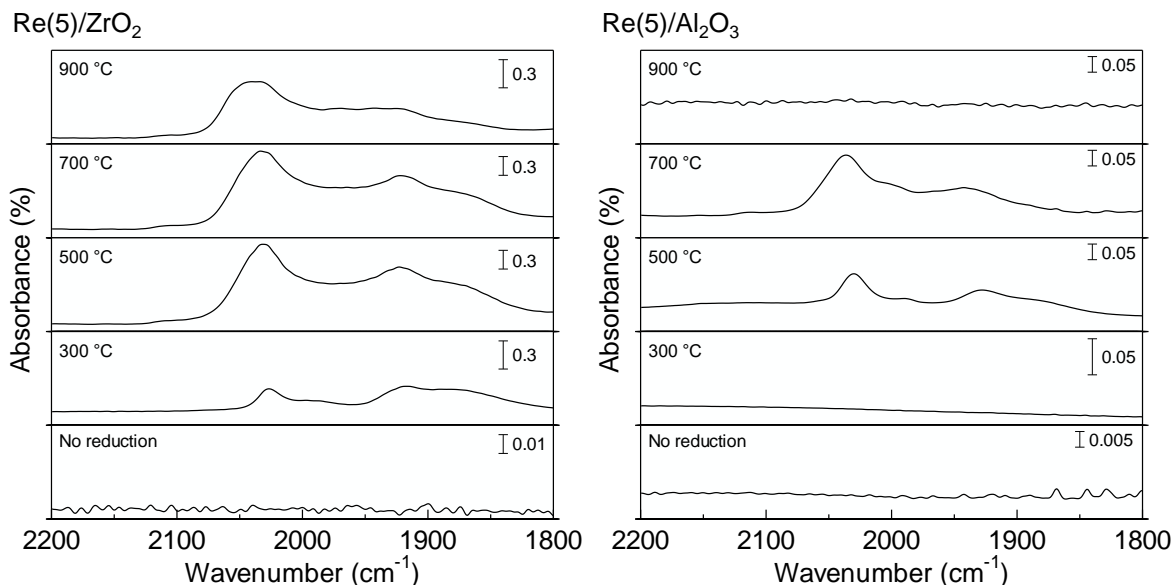

Figure S13. FTIR spectra of CO adsorbed on un-reduced and H<sub>2</sub>-reduced Re(5)/ZrO<sub>2</sub> and Re(5)/Al<sub>2</sub>O<sub>3</sub> catalysts. Each sample was pretreated (if applicable) under a flow of 10% H<sub>2</sub>/He (100 mL min<sup>-1</sup>) for 30 min, exposed to a flow of 1% CO/He (100 mL min<sup>-1</sup>) for 5 min, and purged with He for 5 min.

Table S7. Summary of formal oxidation states, Bader charges for Re species.

| Model                                    | Formal oxidation state of Re | (Average) Bader charge of Re |
|------------------------------------------|------------------------------|------------------------------|
| ReO <sub>2</sub>                         | 4                            | 1.85                         |
| Re <sub>1</sub> /TiO <sub>2</sub> (101)  | 0                            | 0.79                         |
| Re <sub>3</sub> /TiO <sub>2</sub> (101)  | 0                            | 0.40                         |
| Re <sub>13</sub> /TiO <sub>2</sub> (101) | 0                            | 0.14                         |
| Re <sub>20</sub> /TiO <sub>2</sub> (101) | 0                            | 0.13                         |
| Re(0001)                                 | 0                            | 0.00                         |
